# Supplementary material for: A Protein-Protein Interaction Map of the Trypanosoma brucei Paraflagellar Rod
Source: PubMed Central journal article supplement (PMC2766642; doi:10.1371/journal.pone.0007685), 2009-11-03
Supplement: pone.0007685.s003.pdf [file pone.0007685.s003.pdf]

| Accession number | Gene name       | Forward primer                                        | Reverse primer                                      |
|------------------|-----------------|-------------------------------------------------------|-----------------------------------------------------|
| Tb927.8.6660     | PFC1            | ggggacaactttgtacaaaaaagtggcatgATGACGACGATGCAGAG       | ggggacaactttgtacaagaaagtgggTAAGGTGCGAAGGCTG         |
| Tb927.8.4970     | PFR2            | ggggacaactttgtacaaaaaagtggcatgATGAGCGGAAAGGAAAGTT     | ggggacaactttgtacaagaaagtgggTACTGAGTGATCTGCGG        |
| Tb927.8.1550     | PFC3            | ggggacaactttgtacaaaaaagtggcatgATGTCGGCCACTTATCC       | ggggacaactttgtacaagaaagtgggTATGCGCACTCCTCTAC        |
| Tb927.6.4140     | PFC4            | ggggacaactttgtacaaaaaagtggcatgATGCCAAACCTCGTTGT       | ggggacaactttgtacaagaaagtgggGAGCGAGTGAATAAAACTTAATGC |
| Tb927.3.4290     | PFR1            | ggggacaactttgtacaaaaaagtggcatgGTGACGATGCCACTG         | ggggacaactttgtacaagaaagtgggGGTGCAGTGTGTGTTCC        |
| Tb927.3.3770     | PFC6            | ggggacaactttgtacaaaaaagtggcatgATGAGTGCAACAGAGGC       | ggggacaactttgtacaagaaagtgggTAGTACCTAGAGAACCCTGTGTC  |
| Tb927.3.3750     | PFC7            | ggggacaactttgtacaaaaaagtggcatgTCGACTCAACTTATTTCCGGT   | ggggacaactttgtacaagaaagtgggCGCAGCCACGAAAGAA         |
| Tb927.2.5660     | ADKA            | ggggacaactttgtacaaaaaagtggcatgGCGGTACTGAGCGAAG        | ggggacaactttgtacaagaaagtgggCGAAAGCGGTGCTTCT         |
| Tb11.01.6510     | PFC9            | ggggacaactttgtacaaaaaagtggcatgATGTCGTGTCGACCCCA       | ggggacaactttgtacaagaaagtgggTGAGCCTCCGATTTTC         |
| Tb11.01.5100     | PAR1            | ggggacaactttgtacaaaaaagtggcatgATGATCGAGGTGCAACTAAC    | ggggacaactttgtacaagaaagtgggCGAATCGCCCAACTCGA        |
| Tb10.70.7330     | ADKB            | ggggacaactttgtacaaaaaagtggcatgGACCTTCCGATAATAAGTTTGC  | ggggacaactttgtacaagaaagtgggCGGCTCTCCACTGTTT         |
| Tb10.6k15.0810   | PFC14           | ggggacaactttgtacaaaaaagtggcatgATGGAGAAACACAACCGT      | ggggacaactttgtacaagaaagtgggTACTCTTTCACAAGAGCCC      |
| Tb10.61.1260     | PFC15           | ggggacaactttgtacaaaaaagtggcatgATGGCAAGTTCTACAGCAA     | ggggacaactttgtacaagaaagtgggTACATCTCTGGTCTCTCT       |
| Tb10.26.0680     | PFC16           | ggggacaactttgtacaaaaaagtggcatgATGTCTCACTACCTTTGGTCA   | ggggacaactttgtacaagaaagtgggCAGCTATCCTCAGCAAGAAG     |
| Tb927.2.4330     | PFR5            | ggggacaactttgtacaaaaaagtggcatgATGACGCAATCAGCTCAA      | ggggacaactttgtacaagaaagtgggCAATCATCTTCATCACAGGGT    |
| Tb927.7.6970     | PFR6            | ggggacaactttgtacaaaaaagtggcatgAAAAAGAGTGGTCATGAGGG    | ggggacaactttgtacaagaaagtgggTATGAAGACGTTTATGGCGC     |
| Tb10.6k15.0140   | PFC19           | ggggacaactttgtacaaaaaagtggcatgGTTTCAGGGCCACTTGT       | ggggacaactttgtacaagaaagtgggTACGAAGCTTCACTGAGG       |
| Tb927.2.2160     | PFC11           | ggggacaactttgtacaaaaaagtggcatgATGACATCGGAGGAAGC       | ggggacaactttgtacaagaaagtgggTAAATGTATTGCTCCAAATGCTCA |
| Tb927.8.3790     | PFC2            | ggggacaactttgtacaaaaaagtggcatgATGGATGCAGAAGAGAATTTCCT | ggggacaactttgtacaagaaagtgggTACGCACTGTTCGCAG         |
| Tb11.01.3000     | PFC17           | ggggacaactttgtacaaaaaagtggcatgAAGAACAACCCAGTAGTTATGC  | ggggacaactttgtacaagaaagtgggCTTCTGTTTCTGCGCTCT       |
| Tb11.01.4623     | Calmodulin      | ggggacaactttgtacaaaaaagtggcatgATGGCCGATCAACTCTC       | ggggacaactttgtacaagaaagtgggTATTGCTCATCATTTTTTCACGA  |
| Tb927.2.3020     |                 | ggggacaactttgtacaaaaaagtggcatgATGTCGTGATGCGTCCG       | ggggacaactttgtacaagaaagtgggCACTTACCCTCCTCTCC        |
| Tb927.7.1920     | PFC5            | ggggacaactttgtacaaaaaagtggcatgATGTTACAAGCGGCTGA       | ggggacaactttgtacaagaaagtgggCGTCGATTAACCTTTTTCAGGTTT |
| Tb10.389.0100    | PFC20           | ggggacaactttgtacaaaaaagtggcATGGATCAATCATGCAACGAA      | ggggacaactttgtacaagaaagtgggCGTGGGATCCGATACG         |
| Tb10.6k15.1510   | PFC18           | ggggacaactttgtacaaaaaagtggcatgGACTGTGTGATAACTCAGTGG   | ggggacaactttgtacaagaaagtgggTACTGGCGAGCTAATGC        |
| Tb11.01.3000     | PFC17           | ggggacaactttgtacaaaaaagtggcatgAAGAACAACCCAGTAGTTATGC  | ggggacaactttgtacaagaaagtgggCTTCTGTTTCTGCGCTCT       |
| Tb11.02.2350     | PFC12           | ggggacaactttgtacaaaaaagtggcATGGCGAAAAAGGGTAAAAAGA     | ggggacaactttgtacaagaaagtgggCAGTGTGAAGGCAACATATC     |
| Tb927.6.4140     | domain of PFC4  | ggggacaactttgtacaaaaaagtggcTATTTGTGTCACAGCAAAACC      | ggggacaactttgtacaagaaagtgggTGGTCACAAAGTGTGACTTAATTC |
| Tb10.26.0680     | domain of PFC16 | ggggacaactttgtacaaaaaagtggcAAGTTTGAGTACCTTCCCAAC      | ggggacaactttgtacaagaaagtgggTGGTCGCAAACTGTCTGTGTC    |
| Tb09.211.4513    | KMP-11          | ggggacaactttgtacaaaaaagtggcATGCCACCACATACG            | ggggacaactttgtacaagaaagtgggGGGAACGGGCATTTCT         |

700
